# Supplementary material for: Hepatic Glucose Metabolism Disorder Induced by Adipose Tissue-Derived miR-548ag via DPP4 Upregulation
Source: MDPI journal article supplement (doi:10.3390/ijms24032964), 2023-02-03
Supplement: s1 [file s1]

## Supplementary Material

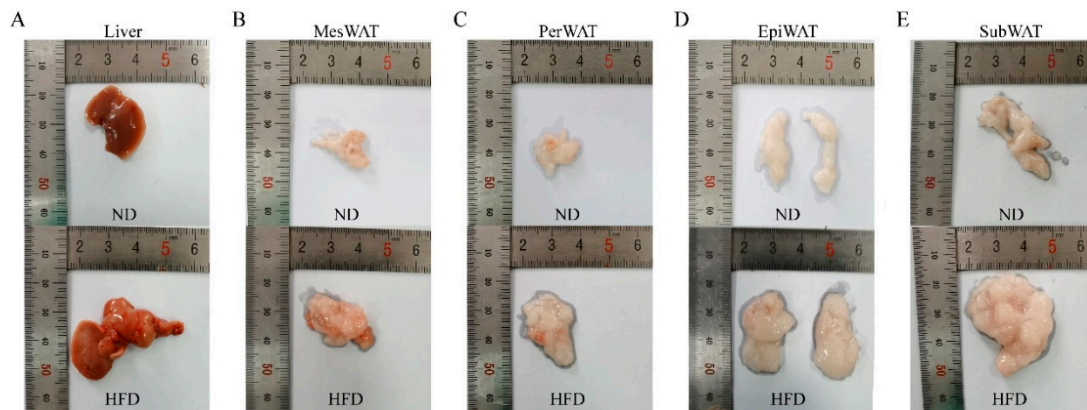

**Supplemental Figure S1. General view of the liver and various adipose tissues.** (A-E) After 12 weeks of high-fat diet, images of liver and various fatty tissues were collected after the death of mice.

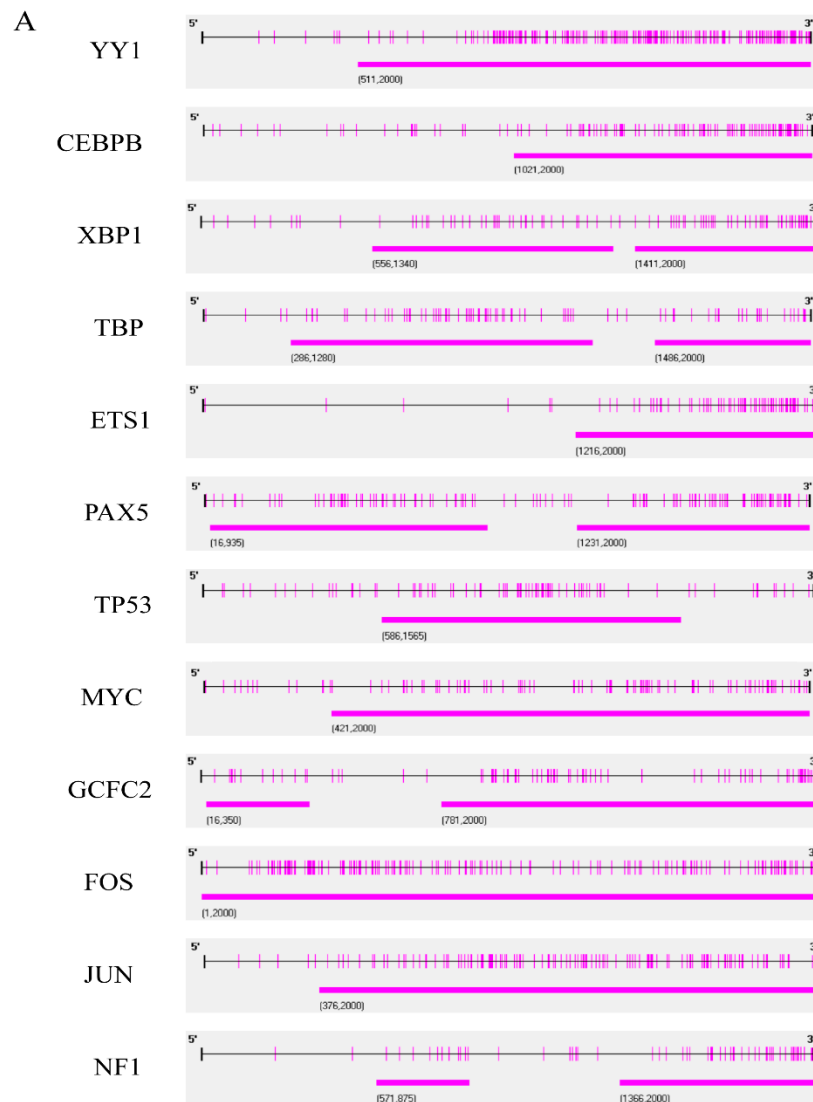

**Supplemental Figure S2. DPP4 Transcription Factor GpG Island.** (A) Use metal prime express\_V1 software analyzes the CpG island of *YY1*, *CEBPB*, *XBP1*, *TBP*, *ETS1*, *PAX5*, *TP53*, *MYC*, *GCFC2*, *FOS*, *JUN* and *NF1*.

**Supplementary Table S1. Primer sequence table**

| Species | primer                         | sequence 5'→3'           |
|---------|--------------------------------|--------------------------|
| Human   | Homo- <i>microRNA-548ag</i> -F | AAAGGUAAUUGUGGUUUCUGC    |
|         | Homo- <i>DNMT3B</i> -F         | GGATGAAGATCAGAGCCGA      |
|         | Homo- <i>DNMT3B</i> -R         | CAAGACAAACAGCCATCTTCC    |
|         | Homo- <i>DPP4</i> -F           | GGGTCACATGGTCACCAGTG     |
|         | Homo- <i>DPP4</i> -R           | TCTGTGTCGTTAAATTGGGCATA  |
|         | Homo- <i>GAPDH</i> -F          | TGTGGGCATCAATGGATTTGG    |
|         | Homo- <i>GAPDH</i> -R          | ACACCATGTATTCCGGGTCAAT   |
| Mouse   | Mus- <i>DNMT3B</i> -F          | CGCACAACCAATGACTCTGCTG   |
|         | Mus- <i>DNMT3B</i> -R          | GGTGACTTCAGAAGCCATCCGT   |
|         | Mus- <i>DPP4</i> -F            | CACCTCTGATGGAAGCAGCTTC   |
|         | Mus- <i>DPP4</i> -R            | GATAATCGCTGGTCAGAGCTTCG  |
|         | Mus- <i>GAPDH</i> -F           | CATCACTGCCACCCAGAAGACTG  |
|         | Mus- <i>GAPDH</i> -R           | ATGCCAGTGAGCTTCCCGTTTCAG |
|         | Mus- <i>U6</i> -F              | CGCTTCGGCAGCACATATAC     |
|         | Mus- <i>U6</i> -R              | AAATATGGAACGCTTCACGA     |

**Supplementary Table S2. Correlation analysis between miR-548ag and Serum biochemical parameters of individuals**

| Index<br>(n=220) | miR-548ag |           |
|------------------|-----------|-----------|
|                  | R         | P-value   |
| Height           | -0.190    | 0.005**   |
| Weight           | 0.078     | 0.253     |
| BMI              | 0.209     | 0.002**   |
| FPG              | 0.209     | 0.002**   |
| TG               | 0.248     | <0.001*** |
| TC               | 0.191     | 0.005**   |
| LDL              | 0.207     | 0.003**   |
| HDL              | 0.214     | 0.002**   |

Statistical analysis was performed using Spearman, \* $P < 0.05$ , \*\* $P < 0.01$ , \*\*\* $P < 0.001$ .

**Supplementary Table S3. The genetic association database class**

| Term           | Count | P-Value  |
|----------------|-------|----------|
| Chemdependency | 14    | 0.014622 |
| Hematological  | 8     | 0.02736  |
| Aging          | 6     | 0.037826 |
| Metabolic      | 16    | 0.059029 |
| Unknown        | 7     | 0.095867 |

**Supplementary Table S4. Effects of mir-548ag and DNMT3b on methylation of CpG site in promoter region of DPP4 gene in HepG2 cells and liver**

|       | Group                  | Methylation rate | Demethylation rate |
|-------|------------------------|------------------|--------------------|
| HepG2 | miR-548ag-NC           | 0                | 100% (170/170)     |
|       | miR-548ag-mimic        | 1.2% (2/170)     | 98.8% (168/170)    |
|       | OE-DNMT3B-NC           | 3.5% (6/170)     | 96.5% (164/170)    |
|       | OE-DNMT3B              | 0                | 100% (170/170)     |
|       | si-DNMT3B-NC           | 0                | 100% (170/170)     |
|       | si-DNMT3B              | 1.8% (3/170)     | 98.2% (167/170)    |
| Liver | miR-548ag-mimic-NC     | 0.5% (1/220)     | 99.5% (219/220)    |
|       | miR-548ag-mimic        | 0.5% (1/220)     | 99.5% (219/220)    |
|       | miR-548ag-inhibitor-NC | 0.5% (1/220)     | 99.5% (219/220)    |
|       | miR-548ag-inhibitor    | 0.3% (0.7/220)   | 99.7% (219.3/220)  |

$\chi^2$  test,  $P>0.05$ .
